# Supplementary material for: Natural soil biotin application activates soil beneficial microorganisms to improve the thermotolerance of Chinese cabbage
Source: Front Microbiol. 2024 Jul 4;15:1408359. doi: 10.3389/fmicb.2024.1408359 (PMC11254703; doi:10.3389/fmicb.2024.1408359)
Supplement: Supplementary file 2 [file Table_2.XLSX]

## Sheet: Guild_sample.Reabundance
Supplementary table 2. The phred score for each sample
OTU ID	CK	SH2O	SNSBS
Algal Parasite-Fungal Parasite-Undefined Saprotroph	0.0241837	0.0126963	0.00223258
Animal Endosymbiont-Animal Pathogen-Endophyte-Plant Pathogen-Undefined Saprotroph	0	0	0
Animal Endosymbiont-Undefined Saprotroph	0	0	0
Animal Parasite-Fungal Parasite	0.500891	0.445842	0.666251
Animal Pathogen	0.000211109	0.00104269	0.00010944
Animal Pathogen-Dung Saprotroph-Endophyte-Plant Saprotroph-Soil Saprotroph-Wood Saprotroph	0.00300244	0.00201178	0
Animal Pathogen-Plant Pathogen-Undefined Saprotroph	0	0.00196271	0.00358964
Animal Pathogen-Plant Pathogen-Wood Saprotroph	0	0	0
Animal Pathogen-Undefined Saprotroph	0	0	0
Arbuscular Mycorrhizal	0	0	0
Dung Saprotroph	0.00905423	0.0130643	0.00761705
Dung Saprotroph-Endophyte-Plant Pathogen-Undefined Saprotroph	0	0	0
Dung Saprotroph-Endophyte-Undefined Saprotroph	0	0	0
Dung Saprotroph-Plant Saprotroph	0.00100863	0.00234298	0.0012914
Dung Saprotroph-Plant Saprotroph-Wood Saprotroph	0.001079	0.00823111	0.00345831
Dung Saprotroph-Soil Saprotroph	0	0.000809617	0
Dung Saprotroph-Soil Saprotroph-Wood Saprotrop	0.00607525	0.00685721	0.00529691
Dung Saprotroph-Undefined Saprotroph	0.139355	0.115162	0.0593604
Dung Saprotroph-Wood Saprotroph	0.00075061	0.00095682	0
Ectomycorrhizal	0	0	0
Ectomycorrhizal-Endophyte-Ericoid Mycorrhizal-Litter Saprotroph-Orchid Mycorrhizal	0	0	0
Ectomycorrhizal-Undefined Saprotroph	0	0	0
Endophyte	0	0.000515211	0.000525314
Endophyte-Lichen Parasite-Plant Pathogen-Undefined Saprotroph	0.00342466	0.00477184	0.00142272
Endophyte-Litter Saprotroph-Wood Saprotroph	0	0	0
Endophyte-Plant Pathogen	0.00194689	0.00130029	0.00116007
Endophyte-Plant Pathogen-Wood Saprotroph	0.00103209	0.00298086	0.000175105
Endophyte-Undefined Saprotroph	0	0.000748283	0
Ericoid Mycorrhizal	0	0	0
Fungal Parasite	0	0	0
Fungal Parasite-Plant Pathogen-Plant Saprotroph	0.00389379	0.00271099	0.00247335
Fungal Parasite-Wood Saprotroph	0	0	0
Insect Parasite-Undefined Saprotroph	0	0.000306673	0
Leaf Saprotroph	0	0	0
Litter Saprotroph-Soil Saprotroph-Wood Saprotroph	0	0	0
Orchid Mycorrhizal-Plant Pathogen-Wood Saprotroph	0	0	0.000196993
Plant Pathogen	0.0205714	0.0302748	0.0208374
Plant Pathogen-Undefined Parasite-Undefined Saprotroph	0.000492588	0.000686948	0.000766082
Plant Pathogen-Undefined Saprotroph	0.00424564	0.00399902	0.00588789
Plant Pathogen-Wood Saprotroph	0	0.000515211	0
Plant Saprotroph-Wood Saprotroph	0	0	0
Soil Saprotroph	0	0	0
Undefined Saprotroph	0.276224	0.336874	0.212752
Undefined Saprotroph-Undefined Biotroph	0	0	0
Undefined Saprotroph-Wood Saprotroph	0.000914806	0.0016315	0.00192615
Wood Saprotroph	0.00164196	0.0017051	0.00267034
